# Supplementary material for: Cannabidiol as a treatment for arthritis and joint pain: an exploratory cross-sectional study
Source: PubMed Central journal article supplement (PMC9400326; doi:10.1186/s42238-022-00154-9), 2022-08-24
Supplement: 42238_2022_154_MOESM1_ESM.pdf [file 42238_2022_154_MOESM1_ESM.pdf]

# CBD & Arthritis Survey

This survey is designed to evaluate the incidence of CBD use in individuals with arthritis. All survey responses are collected anonymously. Please answer all questions below.

## Patient Demographics

---

How old are you?

- 18 years old
  - 18-24 years old
  - 25-34 years old
  - 35-44 years old
  - 45-54 years old
  - 55-64 years old
  - 65-74 years old
  - 75 years and older
  - Prefer not to say
- 

What is your gender?

- Male
  - Female
  - Prefer not to say
- 

What is your ethnicity?

- White
- Hispanic or Latino
- Black or African American
- Asian/Pacific Islander
- Native American or American Indian
- Other
- Not disclosed

---

What state do you live in?

- Alabama
- Alaska
- Arizona
- Arkansas
- California
- Colorado
- Connecticut
- Delaware
- Florida
- Georgia
- Hawaii
- Idaho
- Illinois
- Indiana
- Iowa
- Kansas
- Kentucky
- Louisiana
- Maine
- Maryland
- Massachusetts
- Michigan
- Minnesota
- Mississippi
- Missouri
- Montana
- Nebraska
- Nevada
- New Hampshire
- New Jersey
- New Mexico
- New York
- North Carolina
- North Dakota
- Ohio
- Oklahoma
- Oregon
- Pennsylvania
- Rhode Island
- South Carolina
- South Dakota
- Tennessee
- Texas
- Utah
- Vermont
- Virginia
- Washington
- West Virginia
- Wisconsin
- Wyoming
- Other (Not United States)

---

IF Other, Please Specify what country

---

---

What is your highest level of education?

- No schooling completed
- Nursery school to 8th grade
- High school graduate or equivalent
- Associate degree
- Bachelor's degree
- Doctorate degree
- Not disclosed

---

What is your occupation?

- Arts, Design, Entertainment, Sports, and Media Occupations
- Legal Occupations
- Life, Physical, and Social Science Occupations
- Management Occupations
- Construction and Extraction Occupations
- Healthcare Practitioners and Technical Occupations
- Computer and Mathematical Occupations
- Office and Administrative Support Occupations
- Healthcare Support Occupations
- Production Occupations
- Food Preparation and Serving Related Occupations
- Architecture and Engineering Occupations
- Installation, Maintenance, and Repair Occupations
- Building and Grounds Cleaning and Maintenance Occupations
- Sales and Related Occupations
- Community and Social Service Occupations
- Personal Care and Service Occupations
- Farming, Fishing, and Forestry Occupations
- Protective Service Occupations
- Education, Training, and Library Occupations
- Business and Financial Operations Occupations
- Transportation and Materials Moving Occupations
- Other (please specify)

---

Occupation (Other)

---

---

What is your average yearly income?

- < \$30,000
- \$31,000-\$55,000
- \$56,000-\$75,000
- \$76,000-\$99,000
- \$100,000-\$150,000
- >\$150,000
- I would rather not comment

**Perception/Use of Cannabidiol (CBD)**

Have you ever heard of cannabidiols (CBD)?

- Yes
- No
- Unsure

How did you heard about CBD?

- Internet
- Television
- Periodical
- Social Media
- Friends or family
- Medical personnel
- Unsure

Do you have a form of arthritis and/or an inflammatory joint condition that has been diagnosed by your medical doctor or physician?

- Yes
- No

## Your Joint Pain

**Disclaimer: If you answered no to the previous question, and have no history of joint pain or arthritis conditions your survey should have ended.**

What type of arthritis and/or inflammatory joint condition do you have? (Please select all that apply)

- Osteoarthritis
- Rheumatoid arthritis
- Psoriatic arthritis
- Other autoimmune diagnosis (Lupus, Lyme, etc.)
- Unsure

Does your joint arthritis cause you pain?

- Yes
- No

On a scale of 0-10 with 0 being no pain and 10 being the worst pain imaginable, how would you rate your average daily pain due to your joint condition?

- 0
- 1
- 2
- 3
- 4
- 5
- 6
- 7
- 8
- 9
- 10

In reference to your joint pain, what joint causes you the most discomfort/pain? (Please select all that apply)

- Knee
- Hip
- Shoulder
- Elbow
- Ankle
- Wrist
- Hand

What treatments have you tried for your joint pain? (Please select all that apply)

- Physical therapy
- Steroid Injection
- Viscosupplementation (gel shot)
- PRP (platelet rich plasma)
- Supplements
- Acupuncture
- Opioids
- Tylenol
- Anti-inflammatories (Advil, Ibuprofen, Naproxen, Meloxicam, etc.)
- CBD
- Other
- Unsure

Have you ever spoken to your doctor about using Cannabidiol (CBD)?

- Yes
- No

Do you have family and/or friends that use CBD?

- Yes
- No

Have you ever tried Cannabidiol (CBD) for your joint pain?

- Yes
- No

---

If you haven't tried CBD, is there a reason why?  
(Please select all that apply)

- Unsure about side effects
- Need more information
- Afraid it is illegal
- do not have access to CBD
- Other (please specify)

---

Other (please specify)

\_\_\_\_\_

---

Would you be open to learning more about CBD to help  
manage your joint pain?

- Yes
- No
- Unsure

## Your Experience Using CBD

What method of CBD delivery have you tried?

- Smoking or Vaporizing
- Ingesting in food or beverage
- Ingesting in pill or capsule
- Sublingually (tincture, drops, spray)
- Topically (cream, ointment, balm, lotion)

What type of CBD do you use?

- CBD from hemp (little to no THC)
- CBD from or with Cannabis (some THC)
- Both A and B
- Not sure

What doses (mg) of CBD do you use daily?

- ≤25
- 26mg-75mg
- >75mg

How often do you use CBD for your joint pain?

- More than once a day
- Once a day
- Once a week
- Once a month
- Less than once a month
- Not specified

How long have you been using CBD for your joint pain?

- Less than 30 days
- Between 1 and 6 months
- 6 Months to a year
- 1 to 3 years
- Over 3 years
- Not specified

Prior to using CBD to treat your joint pain how would you rate your pain on a scale to 0-10, with 0 being no pain and 10 being the worst pain imaginable?

- 0
- 1
- 2
- 3
- 4
- 5
- 6
- 7
- 8
- 9
- 10

After using CBD to treat your joint pain how would you rate your pain on a scale to 0-10, with 0 being no pain and 10 being the worst pain imaginable?

- 0
- 1
- 2
- 3
- 4
- 5
- 6
- 7
- 8
- 9
- 10

After using CBD how does this affect your joint pain?

- Lot worse
- Little worse
- No change
- Little better
- Much better

---

After using CBD how does this affect your pain intensity?

- Lot worse
- Little worse
- No change
- Little better
- Much better

---

After using CBD how does this affect your physical function?

- Lot worse
- Little worse
- No change
- Little better
- Much better

---

After using CBD how does this affect your sleep?

- Lot worse
- Little worse
- No change
- Little better
- Much better

---

How satisfied are you with using CBD to alleviate your joint pain?

- Very Satisfied
- Satisfied
- Neutral
- Dissatisfied
- Very Dissatisfied

---

Has using CBD for joint pain reduced the use of other medications?

- No
- Yes
- Unsure

---

What medications have been reduced or stopped from CBD use?

- Less opioids
- stopped opioids
- less Anti-inflammatories
- stopped Anti-inflammatories
- less Tylenol
- stopped Tylenol
- None
- Unsure

---

What are side effects have you have had from using CBD? Select all that apply.

- Dry mouth
- Tiredness
- Bloodshot or dry eye
- Increased appetite
- Headache
- Dizziness
- Digestive upset
- Increased pulse/heart rate
- Impaired concentration
- Increased sensitivity
- Anxiety
- Distorted perception
- Impaired coordination
- Other
- No side effects

---

Of the side effects experienced how would you rate the severity?

- Mild
- Moderate
- Severe
- No side effects



---

Do you think there is good clinical evidence that CBD is helpful?

- Yes
- No
- Unsure

---

How much would you be willing to pay for CBD products in order to treat your arthritis pain?

- < \$25
- \$26-\$50
- \$51-\$75
- \$76-\$100
- \$101-\$125
- \$126-\$150
- >\$150

---

Based on your experience with CBD for joint pain, would you recommend to others?

- Yes
- No
- Unsure
